# Supplementary material for: Fish oil and probiotic food supplements: consumptions and attitudes of pregnant women in four European countries
Source: Springer Nature journal article supplement (doi:10.1007/s00394-025-03654-5), 2025-04-05
Supplement: MOESM1 [file 394_2025_3654_MOESM1_ESM.pdf]

*Fish oil and probiotic food supplements: Consumptions and attitudes of pregnant women in four European countries*

Kristiina Jaakkola<sup>1</sup>, Ella Koivuniemi<sup>1,2</sup>, Kathryn Hart<sup>3</sup>, Natalia Mazanowska<sup>4</sup>, Romana Roccaldo<sup>5</sup>, Laura Censi<sup>5</sup>, Bernadette Egan<sup>3</sup>, Lilja Mattila<sup>1</sup>, Pasquale Buonocore<sup>5</sup>, Eliisa Löyttyniemi<sup>6</sup>, Monique Raats<sup>3</sup>, Stefania Ruggeri<sup>5</sup>, Mirosław Wielgos<sup>7,8</sup>, Kirsi Laitinen<sup>1,2</sup>

Affiliations

<sup>1</sup>Research Centre for Integrative Physiology and Pharmacology, Institute of Biomedicine, Faculty of Medicine, University of Turku, Turku, Finland

<sup>2</sup>Nutrition and Food Research Center, Faculty of Medicine, University of Turku, Turku, Finland

<sup>3</sup>Department of Nutritional Sciences, School of Biosciences and Medicine, Faculty of Health and Medical Sciences, University of Surrey, Guildford, UK

<sup>4</sup>Department of Obstetrics and Gynecology, Institute of Mother and Child, Warsaw, Poland

<sup>5</sup>Council for Agricultural Research and Economics (CREA), Research Centre for Food and Nutrition, Rome, Italy

<sup>6</sup>Biostatistics, Department of Clinical Medicine, University of Turku, Turku, Finland

<sup>7</sup>Department of Obstetrics and Perinatology, National Medical Institute of the Ministry of Interior and Administration, Warsaw, Poland

<sup>8</sup>Medical Faculty, Lazarski University, Warsaw, Poland

ORCID IDs:

Ella Koivuniemi <https://orcid.org/0000-0002-5751-3064>

Kathryn Hart <https://orcid.org/0000-0001-7494-9866>

Natalia Mazanowska <https://orcid.org/0000-0002-6970-5303>

Romana Roccaldo <https://orcid.org/0000-0003-2976-3864>

Laura Censi <https://orcid.org/0000-0002-8769-6914>

Bernadette Egan <https://orcid.org/0000-0002-5767-0457>

Eliisa Löyttyniemi <https://orcid.org/0000-0002-7278-6511>

Monique Raats <https://orcid.org/0000-0002-8057-2783>

Mirosław Wielgos <https://orcid.org/0000-0003-2581-3668>

Kirsi Laitinen <https://orcid.org/0000-0001-5245-8118>

Corresponding author:

Kirsi Laitinen

Nutrition and Food Research Center & Institute of Biomedicine

Faculty of Medicine

University of Turku

Turku

Finland

[kirsi.laitinen@utu.fi](mailto:kirsi.laitinen@utu.fi)

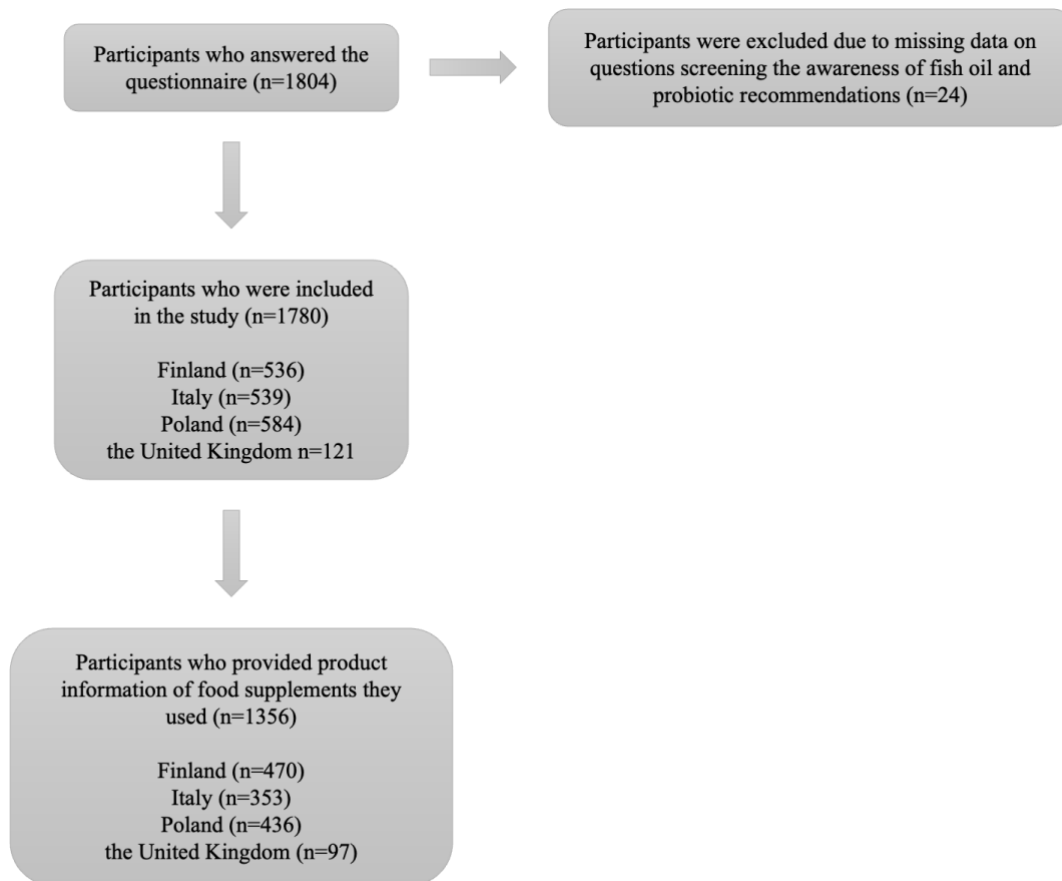

Online resource 1. Flow chart of the study.
